# Supplementary material for: Seismic monitoring of the STIMTEC hydraulic stimulation experiment in anisotropic metamorphic gneiss
Source: Copernicus journal article supplement (doi:10.5194/se-2021-84), 2021-07-02
Supplement: Supplementary file [file se-2021-84-AC1-supplement.pdf]

We would like to thank Chet Hopp (Reviewer 1) for his detailed review and for providing links to new, complementary publications. We have addressed every comment, suggestion and question raised by Chet and our answers are shown in **bold** below. All changes referred to in the manuscript are marked as tracked changes.

Overall assessment: 2nd paragraph

I do think the paper would benefit from a better illustration of the network geometry and distribution of events, as well as to more complete summary of the entirety of the STIMTEC stimulations. **We have added several figures to the Supplementary Material to better illustrate network geometry, raypath geometry and event distribution. All STIMTEC stimulations are listed in Table 2 and 3 to provide an overview and will be discussed in greater detail in another dedicated publication on the induced AE activity.**

My suggestion would be to either 1) more completely document these tangential parts of the paper, including more clearly relating the broadband data to hydraulic data and documenting all of the intervals (not just the two shown in Figure 6), or 2) refocus the paper on determining the velocity model parameters and their effect on the AE locations. **We have followed 1) because this publication is focused on the seismic monitoring of the STIMTEC experiment, which includes the lower frequency range recorded by the broadband sensor.**

General comments:

The formatting of the equations is a bit hard to follow ( $D^*$ , for example). **Improved as much as possible, but these are complex equations. We extended the description on the determination of  $Q$ .**

The citation Renner et al., (2021) isn't yet available and is cited differently than in the author's ARMA paper. **It is the same Reference, which we have clarified more and also made all the changes suggested in comment line 286. All previous STIMTEC publications were conference presentations with proceedings and newsletter summaries.**

Below, I also mention a need for better visualization of the network, seismicity, or (ideally) both. **We have addressed this in several new figures in the Supplementary Material.**

Specific comments:

Ln 187: I'm a little confused here. You're trying to maximize the angle between the foliation and injection borehole, correct? **Yes, we restated this to make it clearer.**

Figure 1: Hard to show on an oblique view, but what's North? I may have missed this, but is the driftway oriented due North? **Yes, the driftway runs north-south. We added the 3-D coordinate system to this and the other figures.**

Ln 269: Previously you mentioned the EDZ is up to 10 m in width. How did you determine you had drilled beyond this with the 1.5 m holes? **We could not yet determine the extent of the EDZ at the STIMTEC site. We have clarified the sentence.**

Ln 286: Not strictly relevant to the analyses in this work, but since you're setting the stage for future analyses (and there appears to be no other review of STIMTEC published), a little more detail on the installation would help. **All points addressed where added to the text. Given that the mounting plate and the glue used to attach the Wilcoxons are both thin (total 3 mm) their effect on the accelerometers' frequency response is in the range beyond the frequency range of interest.**

Ln 333: So all center punch shots (50, 130, 250N) were recorded on all accelerometers? **No, as clarified in the text. Please note that I have a paper in preparation on the centre punch signals containing more details.**

Ln 335: Are the magnitudes still in the works and intended for a separate paper? **Yes, that's correct.**

Ln 348: Just clarifying: The UT surveys comprised 1024 pulses at each meter along the injection borehole, correct? Is this a single transmitter, or a multi-level string of them? **Yes, a single transmitter was used as clarified in the text.**

Ln 350: I'm not familiar with UT sources. Can you please give a little more detail on what it is and how it's deployed? **We added this in the text and provided more details on the orientations and the radiation pattern. The UT used by us is an AE piezo that is operated in the "reverse" way than for recording AE events (powered to generate a displacement). It is installed/coupled exactly the same way as the AE sensors.**

Figure 4a: I don't think you state anywhere what the direction of the black uncertainty vectors signify. **We have added a statement on the direction of the black uncertainty vectors in the first paragraph of Section 4.1 and the figure caption and added a sideview figure to the Supplementary material.**

Also, is it a coincidence that the more highly fractured zones at the top and bottom of the borehole correspond to the zones of higher uncertainty and also the zones where your array coverage is poorest (i.e. larger azimuthal gaps)? It's a little difficult to make out the network geometry with this one oblique view. Can you provide a map-view and a cross section along with one of the figures (e.g. Figure 1, 4a, or 5)? **Velocity model misfit (isotropic velocity model performing better in fractured zones, see updated Figure 4b) and network geometry play a role in determining the length and the direction of the black uncertainty estimates in Figure 4a. Azimuthal gaps are comparable for the vertical validation borehole and the sections in the injection and long inclined validation borehole, where the location uncertainty is largest.**

Figure 4a: All of the larger uncertainties point upwards. Is this a product of such a one-sided array with only 1 sensor (AE hydrophone) below the stimulation intervals? Or, as you state, an underestimation of the attenuation in the fractures zones? **This is predominantly a network geometry effect (as stated above). During the follow-on project STIMTEC-X, which uses more hydrophones near the fracture zones to obtain a better 3-D coverage, which prevented this one-sided elongation.**

Ln 549: What did this reveal about the detection limits? **By detecting lots of events from shallower depth this posed the question of why no events were detected for deeper stimulation intervals. The active UT measurements (which have comparable amplitude to the AE events, but higher frequency content) showed no detection limitations for the deeper sections of the borehole (obtained to 56 m borehole depth similar to stimulations). For this reason, we installed the hydrophone which has reduced detection limits compared to an AE sensor but in retrospect we have found them to be <17 m. We added information on distance between hydrophone and "aseismic" intervals.**

Ln 569: Can you also show the progressive growth with distance from the injection interval in Figure 6? **We have added this to the figure.**

Ln 571-572: Figure 5 would be a good place for a map-view and cross-section to show the reader that the seismicity from injection and vertical validation are distinct. **We have added two sideview figures in the Supplementary Material to address this.**

Figure 6: A few comments:

- Text is too small in most cases **We enlarged the part where text was too small.**
- AE and Hammer bars in the histogram are indistinguishable **We changed hammer markers to green vertical lines.**
- Very hard to see the waveforms, so what's being shown? You say all events, so are these all the waveforms superimposed on each other, stacked, something else? **The raw recordings of the 7 AE events observed during the stimulation of this interval are shown as recorded by one of the AE sensors. We clarified this in the figure caption.**
- What about the other seismically-active intervals? **These will be shown in our next paper.**

Ln 586: It's hard to assess the claim of that these signals resemble pressure and not flow without adding the hydraulic parameters to these plots in some way. **This statement was based on a visual comparison of the filtered signals. In response to this comment, we have calculated the cross-correlation between pressure and broadband signals and flow and broadband signals, respectively. We have checked filtered versus unfiltered as well as smoothed versus original but resampled data and we observed that the correlation with flow is systematically larger (except for two intervals). We have therefore revised this statement accordingly. We added a table to the Supplementary Material showing these cross-correlation values to substantiate this analysis. We also added a figure to the Supplementary Material showing a comparison of the resampled and smoothed broadband sensor data, pressure and flow data for one interval.**

Figure 7: The discussion of the broadband sensors seems a little tangential to the rest of the paper which I see as focused on the AE locations and velocity model. It might be better to leave this out or transfer to the supplements? **We have left this paragraph, because this manuscript is a description and evaluation of the monitoring system. We have made the suggested changes in related comment I.648.**

Ln 601: Plus no (good) S-wave. **Not changed, the analysis of S-waves on AE hydrophones (in the ARMA paper we refer to) is not yet completed, this was a first analysis.**

Ln 607: And destroyed some of the monitoring equipment... **Not changed, not really relevant.**

Ln 609-612: It's a difficult trade-off between near-field monitoring and allowing the fracture to grow unimpeded. EGS Collab #2 will have a central injection well with four surrounding open boreholes (all drilled from same wellhead). Seismic instrumentation will be further afield this time in separate grouted wells (in an attempt to avoid what happened last time). Still, we'll likely intercept the fracture with one of the boreholes surrounding injection. As you mention, this significantly affects the fracture's behavior but also allows us to monitor the fracture at multiple locations (e.g. with a straddle packer or 3D displacement probe). But I agree that seismic monitoring should stay out of the way, especially when using high-sensitivity AEs. **Agreed, the EGS Collab experiments seem to be designed from a "commercial perspective" which differs to our research approach.**

Ln 648-652: If you choose to leave the broadband recordings in the main body of the paper, it would be nice to see a comparison of the waveforms and the hydraulic parameters. **Done, see comment I.586.**

Technical corrections: **All adopted as suggested.**
